Alexander A. Hannenberg, M.D.,\* Mark A. Warner, M.D.†

\*Anesthesia Department, Newton-Wellesley Hospital, Newton, Massachusetts. ahannenberg@partners.org. †Department of Anesthesiology, Mayo Clinic, Rochester, Minnesota.

## References

1. Haller G, Stoelwinder J, Myles PS, McNeil J: Quality and safety indicators in anesthesia. *ANESTHESIOLOGY* 2009; 110:1158-75

2. Edwards FH: Evolution of the Society of Thoracic Surgeons national cardiac surgery database. *J Invasive Cardiol* 1998; 10:485-8

3. Sessler DI: Long-term consequences of anesthetic management. *ANESTHESIOLOGY* 2009; 111:1-4

4. Devereaux PJ: Can attenuation of the perioperative stress response prevent intermediate or long-term cardiovascular outcomes among patients undergoing noncardiac surgery? *ANESTHESIOLOGY* 2009; 111:223-6

5. DeKock M: Expanding our horizons: Transition of acute postoperative pain to persistent pain and establishment of chronic postsurgical pain services. *ANESTHESIOLOGY* 2009; 111:461-3

6. Lagasse RS: Innocent prattle. *ANESTHESIOLOGY* 2009; 110:698-9

## ANESTHESIOLOGY REFLECTIONS

### Portrait of Paul M. Wood, M.D.

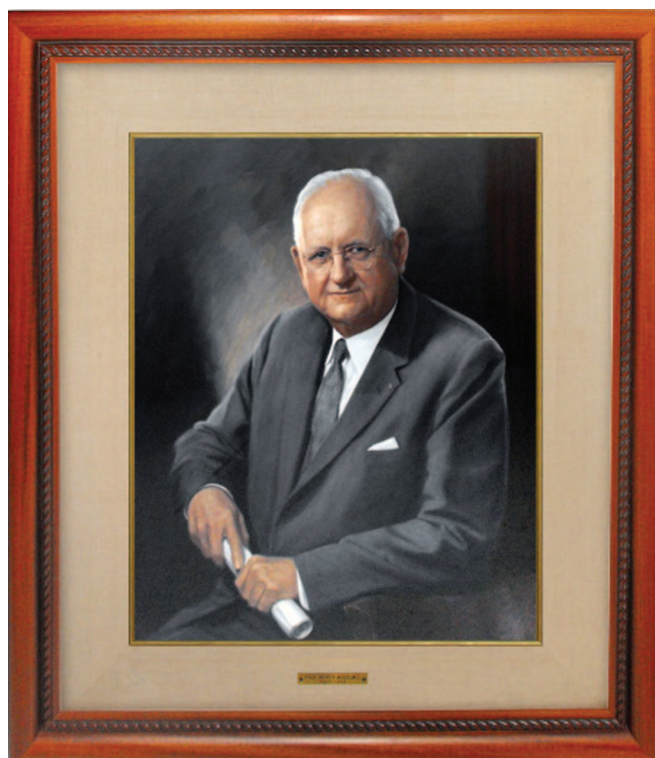

A native Hoosier, Paul Meyer Wood, M.D. (1894-1963), completed medical training in New York, and, following a heart attack, donated his anesthesia library and apparatus collection to the New York Society of Anesthetists (a precursor to the American Society of Anesthesiologists [ASA]). During most of World War II, Librarian-Curator Wood served as *ANESTHESIOLOGY* business manager and as secretary to both the ASA and the American Board of Anesthesiology. In 1963 Wood succumbed to a massive heart attack while planning his fourth visit to organize collections in Illinois for the newly transplanted ASA. An early champion for professionalizing the ASA, Wood is memorialized by the portrait above that proudly hangs in his namesake library-museum. (Copyright © the American Society of Anesthesiologists, Inc. This image appears in color in the *Anesthesiology Reflections* online collection available at [www.anesthesiology.org](http://www.anesthesiology.org).)

George S. Bause, M.D., M.P.H., Honorary Curator, ASA's Wood Library-Museum of Anesthesiology, Park Ridge, Illinois, and Clinical Associate Professor, Case Western Reserve University, Cleveland, Ohio. [UJYC@aol.com](mailto:UJYC@aol.com).
